# Supplementary material for: Kohonen Artificial Neural Network and Multivariate Analysis in the Identification of Proteome Changes during Early and Long Aging of Bovine Longissimus dorsi Muscle Using SWATH Mass Spectrometry
Source: J Agric Food Chem. 2021 Sep 15;69(38):11512–22. doi: 10.1021/acs.jafc.1c03578 (PMC8485349; doi:10.1021/acs.jafc.1c03578)
Supplement: Supplementary file 3 — jf1c03578_si_003.xlsx [file jf1c03578_si_003.xlsx]

## Sheet: Foglio1
	odour	taste	sweet	salty	bitter	acid	flavor	juiciness	tenderness	chewiness	acceptability	WBS
1433E_BOVIN	0.0704812	0.0248691	-0.029968	-0.191677	0.343831	0.265129	-0.623632	-0.234282	-0.0842138	0.427704	-0.205241	-0.122787
AATC_BOVIN	0.196433	0.285438	0.096361	-0.346189	-0.0799437	0.260113	-0.434816	0.0792542	0.217497	-0.315201	0.182376	-0.211749
AATM_BOVIN	0.0203138	0.151836	0.0605646	-0.431457	0.071744	0.203845	-0.231576	-0.0898014	0.00120551	-0.312333	0.0145771	-0.160393
ABEC2_BOVIN	0.295276	-0.244266	-0.320628	-0.18412	0.18619	-0.129651	-0.307576	-0.162184	-0.173962	0.059179	0.109558	0.0098933
ACBP_BOVIN	0.012915	-0.210511	-0.279361	0.392831	-0.172726	-0.285624	0.526282	-0.126673	-0.27604	-0.0778714	0.123401	0.409823
ACON_BOVIN	0.0149289	0.129355	-0.252638	0.612408	0.293808	0.0277161	0.242111	-0.216237	-0.147755	0.154291	0.391536	0.087067
ACTB_BOVIN	0.348627	0.363117	0.0311796	-0.725215	-0.348023	0.0718748	-0.617439	0.206992	0.262841	-0.195104	0.124344	-0.0137416
ACTN2_BOVIN	0.0855248	-0.269098	-0.0327355	-0.30533	0.163969	0.0348547	-0.235553	0.137652	0.155448	-0.177894	0.0813985	-0.280551
ACTN3_BOVIN	0.224543	-0.0481831	0.604394	-0.0577061	-0.296992	0.249574	-0.195296	0.594859	0.641093	-0.199302	-0.15122	-0.563919
ACTS_BOVIN	0.00130977	-0.358517	0.274363	0.101524	0.245729	0.0946213	0.0740476	0.345189	0.312359	-0.165027	0.0107074	-0.642737
ADT1_BOVIN	0.187668	-0.134753	-0.0919297	-0.399145	0.0973421	0.0234489	-0.194523	-0.104744	-0.0133865	-0.18985	0.10503	0.0293254
ALBU_BOVIN	0.050118	0.401327	-0.490357	-0.421631	-0.555224	-0.226183	-0.0951647	-0.222091	-0.257382	-0.282464	0.366813	0.593661
ALDOB_BOVIN	0.340543	0.419653	0.394533	-0.0835639	-0.127731	0.420664	-0.454731	0.305804	0.435013	-0.112119	-0.0550375	-0.312481
ANXA2_BOVIN	-0.227383	-0.121994	-0.309676	0.281222	0.175579	-0.421199	0.512886	-0.255039	-0.521448	0.300322	-0.0720847	0.48142
ANXA6_BOVIN	-0.0390882	-0.416752	0.067629	-0.147186	0.437895	0.213407	-0.300722	0.00850875	0.135916	0.0635196	-0.345849	-0.342516
AT2A1_BOVIN	0.0825908	0.298541	0.426974	-0.187883	-0.191582	0.356212	-0.21583	0.610944	0.679277	-0.411326	0.220436	-0.621386
ATP8_BOVIN	0.763288	0.0108423	0.00853363	-0.333544	-0.192001	-0.161999	-0.414867	-0.401223	-0.182637	0.00862376	-0.268645	0.122969
ATPA_BOVIN	-0.206264	0.17285	0.0254491	-0.430326	0.0847832	0.128986	-0.329551	0.196878	0.251552	-0.0854462	0.152086	-0.346311
ATPB_BOVIN	-0.1125	-0.071978	0.0864035	-0.0684929	0.000713965	0.149291	0.0523636	0.109774	0.00558788	-0.190705	0.102338	-0.256935
ATPG_BOVIN	-0.0451667	-0.0616508	-0.52066	0.0678273	0.172561	-0.331275	0.165557	-0.371999	-0.593518	0.432957	-0.0102157	0.75247
ATPO_BOVIN	0.188401	0.133176	-0.047865	-0.351919	-0.21952	0.0327187	-0.522633	0.158974	0.290179	-0.128214	0.11797	-0.0251544
BPT1_BOVIN	-0.171327	-0.267351	0.650291	0.624912	-0.00205948	0.306038	0.403973	0.32265	0.372505	-0.0463742	-0.142457	-0.545814
CAH3_BOVIN	0.0810577	-0.672201	0.212262	0.182211	0.405727	-0.015722	0.0696321	-0.0901183	-0.150005	0.366804	-0.51495	-0.0695744
CALM_BOVIN	-0.26953	-0.0471166	-0.191703	0.333252	0.192528	-0.163858	0.392688	-0.441329	-0.537185	0.371169	-0.218405	0.530909
CASA1_BOVIN	-0.145696	-0.0101475	-0.0944169	0.313016	0.389033	0.284926	0.11362	-0.300584	-0.136348	-0.022407	0.0919733	0.0824283
CASB_BOVIN	-0.222086	-0.0266544	-0.0737399	0.392356	0.437868	0.294356	0.18226	-0.243843	-0.130775	-0.0166635	0.0910267	0.047902
CC175_BOVIN	0.0653421	0.0160311	-0.22992	-0.237551	-0.116822	-0.102142	-0.153351	0.299755	0.200246	-0.129216	0.424211	0.182631
CCD39_BOVIN	-0.169841	0.112312	-0.339259	-0.307485	0.0755107	0.040256	-0.129799	0.102333	-0.0333633	-0.203257	0.392013	0.170966
CISY_BOVIN	-0.0166974	0.115825	0.15091	-0.529638	0.0520803	0.0980665	-0.31146	0.0625421	0.105454	-0.179958	-0.074033	-0.301955
CO1A1_BOVIN	-0.227446	0.107902	-0.40439	-0.0225636	-0.203839	-0.195699	0.197407	-0.338486	-0.278561	-0.191816	0.148778	0.390142
CO1A2_BOVIN	-0.238317	0.114865	-0.396792	-0.0247416	-0.212732	-0.192537	0.213545	-0.319032	-0.272314	-0.207021	0.155835	0.38773
CO2A1_BOVIN	-0.122497	-0.333497	-0.219198	-0.0547544	-0.0490949	-0.333077	0.410551	0.358115	0.270475	-0.326048	0.49322	-0.000134999
CO3A1_BOVIN	-0.18281	0.401541	-0.426681	-0.207043	-0.159971	-0.109893	0.0385283	-0.206616	-0.134103	-0.30457	0.352198	0.256292
COF2_BOVIN	0.00660486	-0.488524	-0.144522	-0.193166	0.378224	0.276241	-0.275384	-0.262808	-0.276693	0.239276	-0.437371	0.369166
COX2_BOVIN	-0.157573	-0.303992	-0.562886	-0.0200187	0.260203	-0.490267	0.491196	-0.48972	-0.511338	-0.0601484	0.17203	0.361911
CRYAB_BOVIN	-0.164276	-0.405077	0.400234	0.00077775	0.248312	0.297216	-0.102736	0.198247	0.0961557	0.192023	-0.449225	-0.332586
CSRP3_BOVIN	-0.398309	-0.424014	-0.142857	-0.325954	0.566721	0.0663629	-0.0115698	-0.188433	-0.150454	0.0240553	-0.255051	-0.0193749
DESM_BOVIN	0.0738368	-0.182223	0.361305	0.133868	0.100276	0.28286	0.0436119	0.276211	0.195119	-0.17319	-0.0462638	-0.565472
EF1A2_BOVIN	-0.274248	0.080476	0.0265094	0.132798	-0.38986	-0.033766	0.359509	0.0120143	-0.011065	-0.352497	0.169003	0.144131
ENOA_BOVIN	-0.130586	-0.0156437	0.172074	-0.0936257	0.199732	-0.181558	0.0752463	-0.157809	-0.145876	0.230481	-0.454598	0.0857736
ENOB_BOVIN	0.173648	0.271589	0.558379	0.463754	-0.0373465	0.20007	-0.00945936	0.272826	0.421292	0.132156	-0.0829039	-0.516101
ERC6L_BOVIN	-0.0461292	-0.238147	-0.355921	0.0120252	0.334991	-0.0290338	-0.212987	-0.231422	-0.497327	0.385915	-0.224794	0.175225
F16P2_BOVIN	0.5506	0.197077	-0.201044	-0.00255377	0.177825	-0.0469782	-0.416928	-0.303465	-0.12608	0.138044	0.0811101	-0.0116345
FABPH_BOVIN	-0.110125	-0.0816516	-0.547427	-0.327262	0.352941	-0.144694	-0.149019	-0.465197	-0.483804	0.172009	0.0172714	0.530152
FMOD_BOVIN	-0.293407	0.00717061	-0.312121	0.145482	-0.202297	-0.19187	0.333269	-0.284742	-0.279726	-0.130969	0.0996496	0.376949
G3P_BOVIN	0.235134	0.483123	-0.172374	-0.200314	-0.133825	0.122338	-0.338869	0.320935	0.28191	-0.124591	0.428979	0.0926923
G6PI_BOVIN	0.327751	0.576153	0.41552	0.00260459	-0.409531	0.190372	-0.351308	0.450801	0.492747	0.0191042	0.0865399	-0.274286
GNS_BOVIN	-0.288211	-0.0659237	0.0178584	0.491816	0.0319482	0.226688	0.240642	-0.000394572	-0.17009	0.0667022	-0.0616451	-0.0966879
GPDA_BOVIN	0.275039	0.651089	-0.104516	-0.298075	-0.505105	-0.0210465	-0.234836	0.28645	0.209956	-0.268292	0.504249	0.277252
GSTM1_BOVIN	-0.0216201	-0.778789	0.321219	0.313416	0.531961	0.320677	0.242321	0.165586	0.185307	0.000174277	-0.359295	-0.390123
GSTP1_BOVIN	0.156634	-0.265129	-0.623031	-0.255224	0.00508868	-0.234885	-0.00622303	-0.192859	-0.309927	-0.305778	0.265255	0.484849
H2A2C_BOVIN	-0.58625	0.0567068	0.0632162	-0.297675	0.122616	0.450689	-0.221214	0.0215883	-0.00358308	-0.0707686	-0.196017	-0.0625412
H2B1N_BOVIN	-0.249774	0.405215	0.0732753	-0.0128937	-0.124803	0.0942936	0.171417	0.0812931	0.256258	-0.265719	0.301332	-0.203193
H4_BOVIN	0.052169	-0.35657	-0.00420383	-0.339882	0.396976	0.245695	-0.155254	-0.0577207	-0.044979	-0.151887	-0.117488	-0.0798868
HBA_BOVIN	0.172021	0.0237034	-0.212365	-0.473535	-0.221912	-0.082615	-0.0232546	-0.09578	-0.170633	-0.227041	0.1412	0.480974
HBB_BOVIN	0.0503968	0.117894	-0.314811	-0.46233	-0.238999	-0.125298	0.0377905	-0.180705	-0.250398	-0.274673	0.21943	0.594983
HS71A_BOVIN	0.120211	-0.502183	0.383452	-0.065977	0.104516	0.223645	-0.148156	0.272748	0.291923	-0.0623731	-0.27495	-0.3864
HS90A_BOVIN	0.143491	-0.175427	-0.0481595	-0.0849961	-0.25446	-0.198997	0.384869	0.344141	0.0175498	-0.305714	0.271957	0.296718
HSP7C_BOVIN	-0.212808	-0.253808	0.282129	-0.37188	0.215394	0.317995	-0.121767	0.442411	0.361617	-0.326172	-0.09319	-0.431724
HSPB1_BOVIN	-0.386915	-0.53549	0.212556	-0.0158081	0.535889	0.447674	-0.143289	-0.0453381	-0.0124418	0.216841	-0.485485	-0.236402
HSPB6_BOVIN	0.0389939	-0.320144	-0.126117	-0.111438	0.228581	0.0859319	-0.221021	-0.12158	-0.312855	0.350055	-0.255829	0.19104
IDHP_BOVIN	0.00319183	-0.0728608	-0.178825	-0.326884	-0.0104964	0.0733374	-0.117992	0.063828	0.0331462	-0.322905	0.262483	0.0512368
IMDH2_BOVIN	-0.272856	-0.0998401	-0.359785	0.179469	-0.129145	-0.12971	0.306858	-0.32634	-0.292223	-0.157224	0.128033	0.342694
K1C10_BOVIN	0.16239	-0.142859	-0.383322	0.570417	0.174682	-0.318491	0.2332	-0.43709	-0.526122	0.555159	0.0139402	0.307558
K1C17_BOVIN	-0.104262	-0.122056	-0.362516	0.438754	0.221765	-0.335558	0.358782	-0.42345	-0.633193	0.559839	-0.126332	0.529538
K1C25_BOVIN	0.130291	-0.149787	-0.367986	0.570715	0.22982	-0.319103	0.252385	-0.434492	-0.546494	0.595206	-0.00886924	0.307742
K2C5_BOVIN	0.261369	-0.284759	-0.384936	0.5766	0.15953	-0.389992	0.265284	-0.503084	-0.602294	0.534297	-0.0588738	0.268204
K2C71_BOVIN	0.114943	-0.201708	-0.408278	0.545653	0.148294	-0.310036	0.27803	-0.498021	-0.605685	0.547872	-0.0406498	0.418518
K2C73_BOVIN	0.0884562	-0.115624	-0.450065	0.516826	0.157966	-0.305932	0.196901	-0.437261	-0.624013	0.578132	-0.0400849	0.387558
K2C79_BOVIN	0.130229	-0.149437	-0.450876	0.54026	0.207404	-0.399161	0.294023	-0.53005	-0.692746	0.607394	-0.0542534	0.441384
KAD1_BOVIN	0.629815	0.19486	0.426367	-0.0670344	-0.318258	0.239148	-0.436043	0.366949	0.491577	-0.0614123	-2.25035e-05	-0.260457
KCRM_BOVIN	0.296294	0.55664	0.149398	-0.352449	-0.256537	0.248446	-0.403243	0.395546	0.586456	-0.359498	0.459003	-0.122957
KCRS_BOVIN	-0.00819165	-0.0908597	-0.167124	-0.334729	0.0137453	0.00180799	-0.320823	0.0375058	0.0724528	-0.146819	0.12227	-0.136529
KRT35_BOVIN	0.172903	0.454165	-0.149651	0.0803642	-0.374156	-0.102469	-0.201032	0.191581	0.0770865	-0.0230718	0.335915	0.0682822
KRT81_BOVIN	-0.121906	-0.0762758	-0.292268	0.598513	0.0175238	-0.370603	0.48627	-0.170955	-0.612884	0.367741	-0.00404963	0.197346
LDHA_BOVIN	0.435298	0.407675	0.371325	0.0859159	-0.314106	0.115557	-0.341811	0.378675	0.400988	0.0731923	0.0244821	-0.290524
LDHB_BOVIN	-0.141846	-0.0554314	-0.358695	-0.389716	0.0498287	0.0190344	-0.0958475	0.126859	0.0482854	-0.38651	0.381618	0.185322
LEG1_BOVIN	-0.163972	-0.569085	0.42916	-0.121455	0.411658	0.227161	0.0747097	0.085571	0.20404	-0.0591432	-0.44844	-0.477356
MDHC_BOVIN	-0.0164941	0.157679	0.269962	-0.283393	-0.334921	0.24361	-0.130119	0.423932	0.417086	-0.471076	0.249852	-0.342795
MDHM_BOVIN	0.0804401	-0.0169142	0.0394658	-0.412056	-0.0795355	0.11449	-0.270767	0.0219659	0.149954	-0.274628	0.0939163	-0.241039
MIC19_BOVIN	-0.230932	0.0245084	-0.319459	-0.324461	0.149845	0.053321	-0.116049	-0.0229556	-0.140456	-0.141868	0.267644	0.13767
MIME_BOVIN	-0.0040691	0.287073	-0.533536	-0.238034	-0.32918	-0.438181	0.0344359	-0.25301	-0.31525	-0.106451	0.219991	0.390781
MLRS_BOVIN	0.187509	-0.0443476	0.60183	0.438427	0.00852331	0.0293384	0.0626456	0.115545	0.138651	0.418974	-0.477292	-0.439832
MLRV_BOVIN	-0.221758	-0.136386	-0.2313	-0.25992	0.314582	-0.0418375	-0.0793697	-0.214062	-0.24429	0.0311133	0.00578958	0.0703588
MYG_BOVIN	-0.209657	-0.285144	-0.168419	0.0949142	0.182344	-0.131923	0.133192	-0.597755	-0.534859	0.334343	-0.404296	0.305062
MYH1_BOVIN	0.262149	0.608205	0.321724	-0.00224518	-0.606969	0.077206	-0.0713792	0.49516	0.452444	-0.349417	0.301943	-0.228775
MYH2_BOVIN	-0.192247	-0.778912	0.0963631	0.192058	0.665135	0.0398485	0.141411	-0.253009	-0.213198	0.479058	-0.568034	-0.134142
MYH7_BOVIN	-0.146859	-0.275854	-0.0327829	-0.299346	0.267423	-0.0477262	-0.0445967	0.0425912	0.069283	-0.13366	0.0374714	-0.230231
MYL1_BOVIN	-0.342089	-0.204031	-0.0653577	0.42661	0.326561	-0.0882607	0.484527	-0.23156	-0.437447	0.43471	-0.254171	0.38559
MYL3_BOVIN	-0.426612	0.455815	-0.0664759	-0.186541	0.0558263	0.103319	0.00347904	-0.0460851	-0.145578	0.102736	-0.0425639	0.165248
MYL6_BOVIN	0.0576281	-0.386664	0.54958	0.261313	0.234186	0.17925	-0.0252203	0.213622	0.25045	0.289939	-0.490563	-0.493649
MYO10_BOVIN	-0.294158	-0.264645	-0.177295	0.0480708	0.353122	-0.00913792	0.142319	0.0155745	-0.239986	0.198441	0.0381603	0.0438213
MYOM1_BOVIN	-0.0704072	0.116826	0.454574	0.0605508	0.0494738	0.295404	0.0287495	0.385713	0.184191	0.0659558	-0.210429	-0.0677183
MYOZ1_BOVIN	0.286543	0.491915	-0.139579	-0.414415	-0.268944	0.03796	-0.556546	0.0538882	0.0364633	0.14611	0.186253	0.233865
MYOZ2_BOVIN	-0.137634	-0.136825	-0.463549	0.100984	-0.0281733	-0.475924	0.468821	-0.451462	-0.510756	0.0125413	0.122855	0.591089
PABP1_BOVIN	-0.289434	0.0297301	-0.180559	0.129008	0.142019	-0.228019	0.285453	-0.346395	-0.429323	0.301924	-0.204735	0.467672
PARK7_BOVIN	0.0360626	-0.0616115	0.512179	0.239396	-0.299506	0.247762	0.181823	0.475946	0.344778	-0.170804	-0.0489274	-0.0918318
PDLI3_BOVIN	-0.184311	-0.247699	0.417078	0.0679339	0.285425	0.547147	-0.122389	0.0973836	0.367813	-0.0213779	-0.175498	-0.41207
PDLI7_BOVIN	0.194189	-0.162261	0.513503	-0.264737	-0.180669	-0.136682	-0.0444509	0.248386	0.270622	-0.0436969	-0.411896	-0.42774
PEBP1_BOVIN	0.136124	-0.209085	0.293195	0.16238	-0.0508946	0.31665	-0.333681	0.173465	0.216202	0.306114	-0.245579	-0.186245
PFKAM_BOVIN	0.353235	-0.0713135	0.584569	0.0706721	-0.189786	0.305654	-0.162148	0.436761	0.522021	-0.210248	-0.166916	-0.512235
PGAM2_BOVIN	0.359383	0.33875	0.200446	-0.127701	-0.407022	0.173749	-0.266888	0.532423	0.588356	-0.453832	0.405623	-0.314878
PGK1_BOVIN	0.42791	0.345327	0.604796	-0.0825685	-0.318646	0.313437	-0.379026	0.516394	0.53557	-0.0843769	-0.114378	-0.414437
PGM1_BOVIN	0.544045	0.312292	0.497699	-0.223069	-0.267079	0.254879	-0.59763	0.0607214	0.256766	0.13732	-0.365155	-0.337044
PGS2_BOVIN	-0.178623	0.187406	-0.483082	-0.0861184	-0.184829	-0.271029	0.150003	-0.41207	-0.400364	-0.102564	0.132504	0.478479
PLK1_BOVIN	0.0253425	-0.0225339	-0.0587879	0.151228	0.0497206	0.160611	-0.339803	-0.0587975	0.103723	0.305777	-0.0359551	0.00428397
PRDX1_BOVIN	0.189683	0.2136	-0.177683	-0.439235	-0.148448	0.0186543	-0.328827	0.353582	0.359856	-0.331887	0.463123	3.53635e-05
PRDX2_BOVIN	0.266193	-0.035419	0.199174	-0.026139	-0.104824	0.293276	-0.225291	0.156891	0.130014	-0.234941	-0.0555488	-0.309163
PRDX3_BOVIN	0.0953573	-0.121683	-0.0634983	-0.297754	-0.216414	0.0116568	0.0638832	0.333942	0.176702	-0.549267	0.343296	-0.106835
PRDX6_BOVIN	-0.00808195	0.203201	-0.443164	0.0757629	0.219303	-0.142513	-0.137088	-0.0896526	0.00462413	0.0440109	0.515064	0.0140431
PRELP_BOVIN	-0.0987896	0.166637	-0.346067	-0.306937	-0.215399	-0.245194	0.0313749	0.220951	0.0767822	-0.25426	0.269785	0.193211
PROF1_BOVIN	0.198037	-0.0557105	-0.0298861	-0.0806948	-0.454876	-0.038469	0.147283	0.30819	0.219032	-0.366386	0.199641	0.358626
PURA1_BOVIN	0.0445977	0.229514	0.176807	0.257149	0.132958	0.385113	-0.347479	0.214052	0.228363	0.224057	-0.0245109	-0.388771
PYGM_BOVIN	0.221567	0.457624	0.410825	-0.0233878	-0.561944	0.0955758	-0.0747481	0.674418	0.638796	-0.324054	0.309479	-0.259301
QCR1_BOVIN	0.309817	-0.220046	-0.240466	-0.0534199	0.334201	-0.101667	-0.0496673	-0.400776	-0.203959	-0.0246166	0.126126	-0.0059493
RS27A_BOVIN	-0.0668507	-0.365396	-0.306793	0.103911	0.0296897	-0.300118	0.336517	-0.0178922	-0.325577	0.0333546	0.0260795	0.459983
S10A1_BOVIN	-0.037739	0.041995	-0.699384	0.0772977	0.0308135	-0.206695	0.0940178	-0.172526	-0.349953	0.0163587	0.475415	0.665341
SODC_BOVIN	-0.462067	-0.0165744	0.0299106	0.424579	0.293009	0.202111	0.35065	-0.0413511	0.0445777	-0.0426573	0.0305037	-0.123248
SPA31_BOVIN	0.0973179	0.20828	-0.38111	0.079909	-0.00416268	-0.0922832	0.214534	-0.391775	-0.400083	-0.133947	0.290105	0.608637
TBA1B_BOVIN	0.375823	0.0072791	-0.330562	0.337227	-0.0392737	-0.182236	0.184845	-0.219275	-0.186318	-0.0498005	0.483621	0.280477
TBA4A_BOVIN	0.0684914	-0.121873	-0.092355	-0.230431	-0.180586	0.167222	-0.232619	0.138478	-0.184799	0.0296912	-0.149723	0.220976
TBB5_BOVIN	0.286757	-0.267407	0.261529	0.103545	-0.275134	0.285941	0.104087	0.239813	0.180071	-0.388	-0.0651276	0.0218118
TEX14_BOVIN	0.0369579	-0.0364158	-0.0900619	0.217357	-0.0811889	-0.552522	0.219655	-0.0287836	0.103246	0.0777188	0.145826	-0.257875
THIL_BOVIN	0.153348	0.129063	-0.407646	-0.136753	-0.12119	-0.0909125	0.0367074	0.00393124	-0.145031	-0.382992	0.502573	0.239494
TNNC1_BOVIN	-0.121093	-0.284204	-0.207687	-0.270675	0.340846	-0.148813	-0.0745338	-0.425914	-0.375468	0.159049	-0.216527	0.20278
TNNT1_BOVIN	-0.156599	0.0206256	-0.504461	-0.305833	0.238085	-0.111058	-0.269703	-0.141037	-0.174507	0.0936294	0.265814	0.217882
TNNT3_BOVIN	-0.0886866	-0.131145	-0.131735	0.080497	0.252495	0.168928	-0.22374	0.263502	0.18793	0.217319	0.0601959	-0.101597
TPIS_BOVIN	0.471641	0.331945	0.534129	0.117396	-0.341711	0.272642	-0.266863	0.467027	0.558374	-0.146329	0.0569319	-0.379016
TPM1_BOVIN	0.0924267	-0.118733	0.305271	0.598354	0.107459	-0.011614	0.190399	0.0721287	-0.0460461	0.433031	-0.287627	-0.148954
TPM2_BOVIN	-0.401217	-0.497471	-0.333049	0.286744	0.685794	0.0550616	0.282578	-0.293321	-0.28777	0.253932	-0.0497908	0.277658
TPM3_BOVIN	0.0505225	-0.297267	-0.185985	-0.246756	0.590284	0.0109358	-0.162915	-0.258263	-0.318979	0.327413	-0.259427	0.210833
TPST2_BOVIN	0.0208222	-0.0423577	-0.477334	0.365166	0.437989	-0.2331	0.30626	-0.381637	-0.546615	0.217857	0.178415	0.389045
TRFE_BOVIN	-0.429949	-0.0208804	-0.307525	0.17744	-0.00629688	-0.154065	0.62972	-0.0838948	-0.314178	-0.253118	0.269792	0.456388
TRM11_BOVIN	-0.0886697	-0.48969	0.16806	0.89132	0.446121	0.0428491	0.55677	-0.172122	-0.281579	0.331724	-0.242759	-0.213754
UBP33_BOVIN	0.0290835	-0.0456462	-0.45739	-0.136012	0.307811	0.074775	-0.363617	-0.472292	-0.460291	0.303363	-0.0371536	0.357186
VDAC1_BOVIN	-0.333628	-0.178398	-0.212665	0.599604	0.418848	-0.256267	0.471949	-0.174917	-0.343252	0.266784	0.0452453	-0.0404568
VIME_BOVIN	-0.34361	-0.189511	-0.638816	0.0289692	-0.117055	-0.386451	0.338305	-0.326263	-0.495777	-0.0376499	0.186507	0.628632
